# Supplementary material
Source: Springer Nature journal article supplement (https://www.springermedizin.de/resource/supplementary/12985_2010_1060_MOESM1_ESM.pdf/9609054)

**A**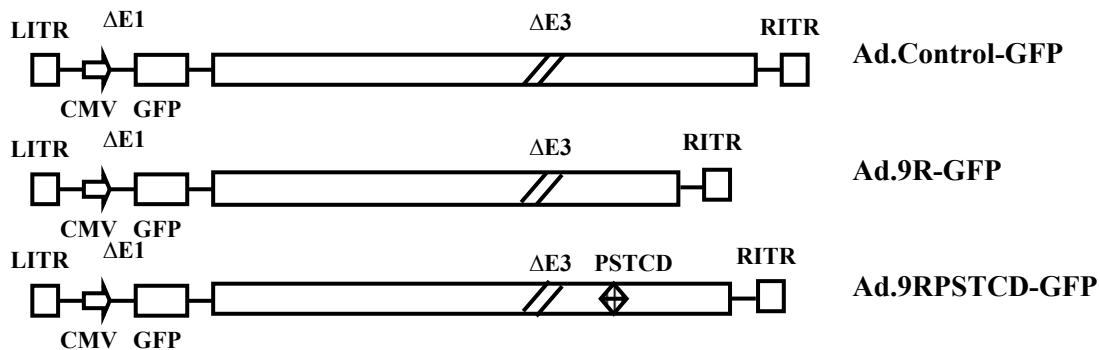**B****Anti-fiber**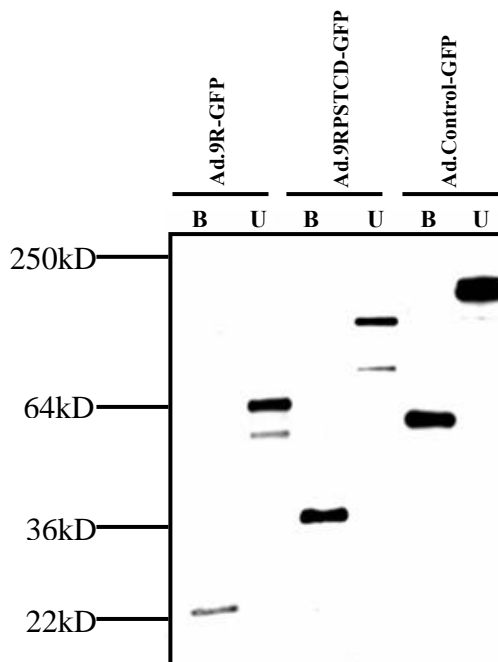**Streptavidin-HRP**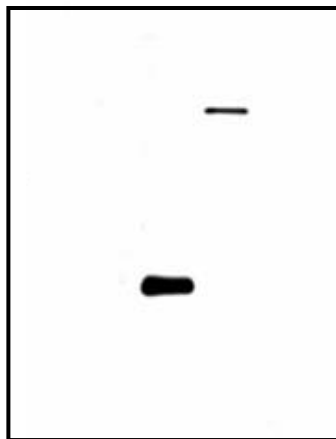

Supplement: MOESM1 [file 9609054]
